# Supplementary material for: Hepatic copper concentrations in 546 dogs (1982–2015)
Source: PubMed Central journal article supplement — J Vet Intern Med. 2018 Oct 7;32(6):1943–50. doi: 10.1111/jvim.15308 (PMC6272033; doi:10.1111/jvim.15308), 2018-10-07
Supplement: JVIM-32-1943-s001.pdf [file JVIM-32-1943-s001.pdf]

**Supplementary Table 1.** Other breeds represented in the non-predisposed (NPB) population.

|                               |   |
|-------------------------------|---|
| Afghan Hound                  | 1 |
| American Eskimo               | 2 |
| Australian Shepherd           | 2 |
| Belgian Malinois              | 1 |
| Bernese Mountain Dog          | 1 |
| Bichon Frise                  | 1 |
| Bloodhound                    | 1 |
| Border Collie                 | 1 |
| Borzoi                        | 2 |
| Boston Terrier                | 1 |
| Boxer                         | 1 |
| Briard                        | 1 |
| Brittany                      | 1 |
| Brussels Griffon              | 1 |
| Bull Terrier                  | 1 |
| Cairn Terrier                 | 1 |
| Cavalier King Charles Spaniel | 2 |
| Chihuahua                     | 5 |
| Cockapoo                      | 4 |
| Collie                        | 1 |
| Dachshund                     | 4 |
| English Bulldog               | 1 |
| English Setter                | 3 |
| English Springer Spaniel      | 1 |
| French Bulldog                | 1 |
| German Shorthaired Pointer    | 1 |
| German Wirehaired Pointer     | 1 |
| Irish Setter                  | 3 |
| Irish Wolfhound               | 1 |
| Keeshond                      | 1 |
| Lhasa Apso                    | 3 |
| Malamute                      | 1 |
| Maltese                       | 1 |
| Mastiff                       | 1 |
| Miniature Pinscher            | 1 |
| Miniature Schnauzer           | 1 |
| Newfoundland                  | 2 |
| Norwich Terrier               | 1 |
| Papillon                      | 1 |
| Pomeranian                    | 1 |
| Poodle                        | 5 |
| Portuguese Water Dog          | 1 |
| Pug                           | 3 |
| Rottweiler                    | 2 |
| Saint Bernard                 | 1 |
| Samoyed                       | 1 |
| Schnauzer                     | 1 |
| Scottish Deerhound            | 1 |
| Scottish Terrier              | 4 |
| Springer Spaniel              | 2 |
| Standard Schnauzer            | 3 |
| Walker Hound                  | 1 |
| Welsh Corgi                   | 4 |
